# Supplementary material
Source: PubMed Central journal article supplement (PMC8491032)
Supplement: kiab339_supplementary_data.pdf [file kiab339_supplementary_data.pdf]

1 **Supplemental Data**

2

3 **Supplemental Materials and Methods**

4

5 **Plant Growth Conditions**

6 Plant material and growth conditions. All *Arabidopsis thaliana* plants were of the ecotype Columbia  
7 0 (Col-0). Plants were grown on soil under short day conditions (16 h light /16 h dark, 100  $\mu\text{E m}^{-2} \text{s}^{-1}$   
8  $^{-1}$  of Cool White Neon lamps) at 22°C and 75% relative humidity. Seeds were surface-sterilized by  
9 vapor-phase sterilization (Clough and Bent, 1998) and plated on half-strength MS medium  
10 (Murashige and Skoog, 1962) (Duchefa, <http://www.duchefa-biochemie.com/>) supplemented with  
11 0.1% sucrose (w/v), 0.05% 2-(N-morpholino)ethanesulfonic acid (MES) (w/v), pH 5.8, and 0.8% (w/v)  
12 plant agar (Duchefa, <http://www.duchefa-biochemie.com/>). After stratification at 4°C in the dark for 2  
13 days, plates were transferred to the growth chamber under long day conditions (16 h light/8 h dark,  
14 100  $\mu\text{E m}^{-2} \text{s}^{-1}$  of Cool White Neon lamps) at 22°C. The plates were kept vertically and seedlings  
15 were used for imaging 6-7 days after germination.

16

17 **Wide-field fluorescence microscopy.** For wide-field  $\text{Ca}^{2+}$  imaging analyses in seedling roots of  
18 pUBQ10-R-GECO1, pCaMV35S-YC-Nano 65, and pUBQ10-pH-GFP lines, an inverted fluorescence  
19 Nikon microscope (Ti-E; <http://www.nikon.com/>) with a CFI Plan Apo VC 20X (N.A 0.75) was used.  
20 Excitation light was produced by a fluorescent lamp (Prior Lumen 200 PRO; Prior Scientific;  
21 <http://www.prior.com>) set to 20% with 561 nm (540/25 nm) for the R-GECO1, and 440 nm (436/20  
22 nm) for YC-Nano 65. R-GECO1 fluorescence emissions was collected at 505–530 nm and at 576–  
23 626 nm respectively. For the analysis of the YC-Nano 65 line, the FRET CFP/YFP optical block  
24 A11400-03 (emission 1, 483/32 nm for ECFP; emission 2, 542/27 nm for FRET/Citrine) with a  
25 dichroic 510 nm mirror (Hamamatsu) was used. For pH-GFP imaging, the emissions were collected  
26 using a 505/530 nm bandpass filter (Chroma Technology Corp., Bellows Falls, Vermont, USA) with  
27 both excitation wavelengths (405 and 488 nm) used sequentially to illuminate the sample. Camera  
28 binning (2 x 2 or 4 x 4) and exposure times (from 50 to 400 ms) were adjusted depending on the  
29 sensor line. Images were acquired every 5 s. Filters, and the dichroic mirrors were purchased from  
30 Chroma Technology (<http://www.chroma.com/>). NIS-Elements (Nikon; [http://www.nis-](http://www.nis-elements.com/)  
31 [elements.com/](http://www.nis-elements.com/)) was used as a platform to control the microscope, illuminator, and camera. Images  
32 were analyzed using FIJI.

33

34 **Seedling imaging.** Six-day-old seedlings were used for root imaging. For root experiments,  
35 seedlings were kept in the growth chamber until the experiment and gently removed from the plate  
36 according to Behera et al. (2018), placed in the dedicated chambers and overlaid with cotton wool  
37 soaked in imaging solution with (5 mM KCl, 10 mM MES, 1.5 mM  $\text{CaCl}_2$  pH 5.8 adjusted with Tris-

38 base) or without calcium (5 mM KCl, 10 mM MES, 0 mM CaCl<sub>2</sub> pH 5.8 adjusted with Tris-base). The  
39 root was continuously perfused with imaging solution using a perfusion pump (Behera et al., 2018)  
40 while the shoot was not submerged. For the experiments reported in Fig. 3 treatments were carried  
41 out by supplementing the imaging solution (1.5 mM calcium or 0-calcium) with 0.01 mM NAA (from  
42 a 10.74 mM stock solution) administered for 3 min under continuous perfusion. For the experiment  
43 reported in Fig. 4 the solution with 1.5 mM calcium was changed with the one with 0-calcium at the  
44 indicated time.

45

46 **Quantitative imaging analysis.** Fluorescence intensity was determined over regions of interest  
47 (ROIs), which corresponded to the transition zone of seedling root tips. R-GECO1 emissions of the  
48 analyzed ROIs were used for single fluorescence emissions analyses. cpVenus and ECFP  
49 emissions of YC-Nano 65 of the analyzed ROIs were used for the ratio (R) calculation  
50 (cpVenus/ECFP). pH-GFP 405 and 488 emissions of the analyzed ROIs were used for the ratio (R)  
51 calculations (405<sub>em</sub>/488<sub>em</sub>). Background subtraction was performed in all experiments.

52

53 
$$\text{Ratio cpVenus/ECFP} = (\text{cpVenus} - \text{cpVenus Background}) / (\text{ECFP} - \text{ECFP Background})$$

54

55 
$$\text{Ratio 405/488} = (405_{\text{em}} - 405_{\text{em}} \text{ Background}) / (488_{\text{em}} - 488_{\text{em}} \text{ Background})$$

56

57 Fluorescence (F) and ratio (R) values for the R-GECO1 and YC-Nano 65 at different time points  
58 were normalized to the initial fluorescence (F<sub>0</sub>) (ΔF/F<sub>0</sub>) or ratio (R<sub>0</sub>) (ΔR/R<sub>0</sub>) and plotted versus time.

59

60 
$$\Delta F / F_0 = (F_{\text{R-GECO1}} - F_{0 \text{R-GECO1}}) / F_{0 \text{R-GECO1}}$$

61

62 
$$\Delta R / R_0 = (\text{Ratio}_{\text{cpvenus/ECFP}} - R_{0 \text{cpvenus/ECFP}}) / R_{0 \text{cpvenus/ECFP}}$$

63

64 **Statistical analysis.** All the data are representative of n ≥ 4 experiments. Reported traces are  
65 averages of traces from all single experiments ± standard deviations (SD). Data from experiments  
66 with at least n = 5 were plotted as box-and-whisker plots using GraphPad, in which all the  
67 experimental points are plotted, and their distribution represented as a box that extends from the  
68 25<sup>th</sup> to 75<sup>th</sup> percentiles. The line in the middle of the box is plotted at the median. p values were  
69 calculated with an unpaired Student's *t* test.

70

71 **Supplemental Figures**

72

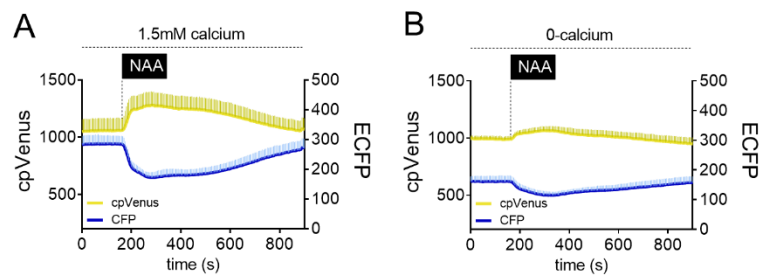

**Supplemental Figure S1.** Single wavelength emissions as arbitrary units of fluorescence of cpVenus (yellow trace) and ECFP (light blue trace) of the YC-Nano 65 used for the ratio calculations of Fig. 3C, G. (A) Averaged cpVenus and ECFP fluorescence emissions over time in root tip cells in response to 10 μM 1-naphthylacetic acid (NAA) as indicated by the black box on the x-axis in presence of 1.5 mM CaCl<sub>2</sub> in the imaging solution. (B) Averaged cpVenus and ECFP fluorescence emissions over time in root tip cells in response to 10 μM NAA as indicated by the black box on the x-axis in 0-calcium in the imaging solution. Traces are the average of n = ≥ 5. Error bars = SD.

73
